# Supplementary material for: Glacial erosion and history of Inglefield Land, northwestern Greenland
Source: Copernicus journal article supplement (doi:10.5194/tc-19-2067-2025), 2025-06-19
Supplement: Supplementary file 1 [file tc-19-2067-2025-supplement.zip]

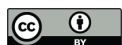

## *Supplement of*

# **Glacial erosion and history of Inglefield Land, northwestern Greenland**

**Caleb K. Walcott-George et al.**

*Correspondence to:* Caleb K. Walcott-George ([ckwalcot@buffalo.edu](mailto:ckwalcot@buffalo.edu))

- [tc-19-2067-2025-supplement-title-page.pdf](#)
- [egusphere-2024-2983-supplement-version2](#)
  - Walcott-George et al. supplement revision
    - \* Walcott-George et al. code and inputs
    - \* cosmogenic nuclide data tables

The copyright of individual parts of the supplement might differ from the article licence.
